# Supplementary material
Source: bioRxiv or medRxiv preprint supplement (http://medrxiv.stage.highwire.org/highwire/filestream/93412/field_highwire_adjunct_files/2/2020.08.15.20175562-3.pdf)
Supplement: Supplementary file [file 2020.08.15.20175562-3.pdf]

## SUPPLEMENTARY MATERIALS

### Supplementary Material C– STROBE statement for cross-sectional studies

|                          | Item No | Recommendation                                                                                                                                                                       | Page No  |
|--------------------------|---------|--------------------------------------------------------------------------------------------------------------------------------------------------------------------------------------|----------|
| Title and abstract       | 1       | (a) Indicate the study’s design with a commonly used term in the title or the abstract                                                                                               | 1        |
|                          |         | (b) Provide in the abstract an informative and balanced summary of what was done and what was found                                                                                  | 1        |
| Introduction             |         |                                                                                                                                                                                      |          |
| Background/rationale     | 2       | Explain the scientific background and rationale for the investigation being reported                                                                                                 | 2        |
| Objectives               | 3       | State specific objectives, including any prespecified hypotheses                                                                                                                     | 2        |
| Methods                  |         |                                                                                                                                                                                      |          |
| Study design             | 4       | Present key elements of study design early in the paper                                                                                                                              | 2-3      |
| Setting                  | 5       | Describe the setting, locations, and relevant dates, including periods of recruitment, exposure, follow-up, and data collection                                                      | 2        |
| Participants             | 6       | (a) Give the eligibility criteria, and the sources and methods of selection of participants                                                                                          | 2        |
| Variables                | 7       | Clearly define all outcomes, exposures, predictors, potential confounders, and effect modifiers. Give diagnostic criteria, if applicable                                             | 3, S1-2  |
| Data sources/measurement | 8*      | For each variable of interest, give sources of data and details of methods of assessment (measurement). Describe comparability of assessment methods if there is more than one group | 3, S1-2  |
| Bias                     | 9       | Describe any efforts to address potential sources of bias                                                                                                                            | 3, 14,15 |
| Study size               | 10      | Explain how the study size was arrived at                                                                                                                                            | 2        |
| Quantitative variables   | 11      | Explain how quantitative variables were handled in the analyses. If applicable, describe which groupings were chosen and why                                                         | 3, S1-2  |
| Statistical methods      | 12      | (a) Describe all statistical methods, including those used to control for confounding                                                                                                | 3        |
|                          |         | (b) Describe any methods used to examine subgroups and interactions                                                                                                                  | 3        |
|                          |         | (c) Explain how missing data were addressed                                                                                                                                          | 3        |
|                          |         | (d) If applicable, describe analytical methods taking account of sampling strategy                                                                                                   | N.A.     |
|                          |         | (e) Describe any sensitivity analyses                                                                                                                                                | N.A.     |
| Results                  |         |                                                                                                                                                                                      |          |
| Participants             | 13*     | (a) Report numbers of individuals at each stage of study—eg numbers potentially eligible, examined for eligibility, confirmed                                                        | N.A.     |

|                          |     |                                                                                                                                                                                                              |       |
|--------------------------|-----|--------------------------------------------------------------------------------------------------------------------------------------------------------------------------------------------------------------|-------|
|                          |     | eligible, included in the study, completing follow-up, and analysed                                                                                                                                          |       |
|                          |     | (b) Give reasons for non-participation at each stage                                                                                                                                                         | N.A.  |
|                          |     | (c) Consider use of a flow diagram                                                                                                                                                                           | N.A.  |
| Descriptive data         | 14* | (a) Give characteristics of study participants (eg demographic, clinical, social) and information on exposures and potential confounders                                                                     | 3-5   |
|                          |     | (b) Indicate number of participants with missing data for each variable of interest                                                                                                                          | 3     |
| Outcome data             | 15* | Report numbers of outcome events or summary measures                                                                                                                                                         | 4-5   |
| Main results             | 16  | (a) Give unadjusted estimates and, if applicable, confounder-adjusted estimates and their precision (eg, 95% confidence interval). Make clear which confounders were adjusted for and why they were included | 6-13  |
|                          |     | (b) Report category boundaries when continuous variables were categorized                                                                                                                                    | N.A.  |
|                          |     | (c) If relevant, consider translating estimates of relative risk into absolute risk for a meaningful time period                                                                                             | N.A.  |
| Other analyses           | 17  | Report other analyses done—eg analyses of subgroups and interactions, and sensitivity analyses                                                                                                               | N.A.  |
| <b>Discussion</b>        |     |                                                                                                                                                                                                              |       |
| Key results              | 18  | Summarise key results with reference to study objectives                                                                                                                                                     | 14    |
| Limitations              | 19  | Discuss limitations of the study, taking into account sources of potential bias or imprecision. Discuss both direction and magnitude of any potential bias                                                   | 15    |
| Interpretation           | 20  | Give a cautious overall interpretation of results considering objectives, limitations, multiplicity of analyses, results from similar studies, and other relevant evidence                                   | 14-16 |
| Generalisability         | 21  | Discuss the generalisability (external validity) of the study results                                                                                                                                        | 15    |
| <b>Other information</b> |     |                                                                                                                                                                                                              |       |
| Funding                  | 22  | Give the source of funding and the role of the funders for the present study and, if applicable, for the original study on which the present article is based                                                | 19    |

\*Give information separately for exposed and unexposed groups.

Von Elm, E., Altman, D. G., Egger, M., Pocock, S. J., Gøtzsche, P. C., Vandenbroucke, J. P., & Strobe Initiative. (2014). The Strengthening the Reporting of Observational Studies in Epidemiology (STROBE) Statement: guidelines for reporting observational studies. *International Journal of Surgery*, 12(12), 1495-1499. doi: <https://doi.org/10.1016/j.ijsu.2014.07.013>
